# Supplementary material for: Cigarette smoke sustains immunosuppressive microenvironment inducing M2 macrophage polarization and viability in lung cancer settings
Source: PubMed Central journal article supplement (PMC11111031; doi:10.1371/journal.pone.0303875), 2024-05-22
Supplement: pone.0303875.s001.pdf [file pone.0303875.s001.pdf]

**Minimal data set to consist of the data required to replicate all study findings reported in the article**

**Figure 1**

- The values behind the means, standard deviations and other measures reported;

- The values used to build graphs.

– Panel B

| RAW        | RAW+IFN- $\gamma$ | RAW+LLCsur | RAW         | RAW+IFN- $\gamma$ | RAW+LLCsur  |
|------------|-------------------|------------|-------------|-------------------|-------------|
| 0,0254728  | 0,06077913        | 0,03410717 | 0,01980473  | 0,009335829       | 0,03126448  |
| 0,02458732 | 0,1112081         | 0,01018521 | 0,01708502  | 0,00544679        | 0,006008679 |
| 0,02034131 | 0,1606548         | 0,01035044 | 0,008748688 | 0,004252627       | 0,008916133 |
| 0,025640   | 0,094740          | 0,011290   |             |                   |             |

– Panel C

| RAW        | RAW+IFN- $\gamma$ | RAW+LLCsur |
|------------|-------------------|------------|
| 0,01669218 | 0,01502938        | 0,01149777 |
| 0,0125859  | 0,03749924        | 0,01866937 |
| 0,01216165 | 0,03644423        | 0,0192235  |
| 0,01837999 | 0,04456175        | 0,02336948 |

– Panel D

| RAW         | RAW+IFN- $\gamma$ | RAW+LLCsur  |
|-------------|-------------------|-------------|
| 0,01980473  | 0,009335829       | 0,03126448  |
| 0,01708502  | 0,00544679        | 0,006008679 |
| 0,008748688 | 0,004252627       | 0,008916133 |

– Panel E

| RAW         | RAW+IFN- $\gamma$ | RAW+LLCsur  |
|-------------|-------------------|-------------|
| 0,001360    | 0,000110          | 0,001000    |
| 0,001280132 | 0,000373568       | 0,007146017 |
| 0,000908056 | 0,000283797       | 0,006073832 |

– Panel F

| RAW           | RAW+IFN- $\gamma$ | RAW+LLCsur  |
|---------------|-------------------|-------------|
| 0,0000161993  | 0,000334264       | 0,000184279 |
| 0,000012816   | 0,000303087       | 0,000295666 |
| 0,00000996837 |                   | 0,000259239 |

– Panel G

| RAW           | RAW+IFN- $\gamma$ | RAW+LLCsur  |
|---------------|-------------------|-------------|
| 0,0000113196  | 0,000519091       | 0,007264814 |
| 0,0000103704  | 0,000422784       | 0,007018715 |
| 0,00000943357 | 0,000389808       | 0,006899107 |

**Figure 2**

- The values behind the means, standard deviations and other measures reported;
- The values used to build graphs.

– Panel B

|                      | M1       | M1 + CSE | M0         | M0+CSE     |
|----------------------|----------|----------|------------|------------|
|                      | 0,023300 | 0,018500 |            |            |
|                      | 0,020355 | 0,022604 |            |            |
|                      | 0,013069 | 0,013270 |            |            |
|                      |          |          | 0,01520375 | 0,01624353 |
|                      |          |          | 0,01477979 | 0,01765994 |
| Number of values     |          |          | 3          | 3          |
|                      |          |          |            | 2          |
| Minimum              |          |          | 0,01307    | 0,01327    |
| 25% Percentile       |          |          | 0,01307    | 0,01327    |
| Median               |          |          | 0,02036    | 0,0185     |
| 75% Percentile       |          |          | 0,0233     | 0,02260    |
| Maximum              |          |          | 0,0233     | 0,02260    |
| Mean                 |          |          | 0,01891    | 0,01812    |
| Std. Deviation       |          |          | 0,005267   | 0,004678   |
| Std. Error           |          |          | 0,003041   | 0,002701   |
|                      |          |          |            | 0,0002120  |
|                      |          |          |            | 0,0007082  |
| Lower 95% CI of mean |          |          | 0,005825   | 0,006503   |
| Upper 95% CI of mean |          |          | 0,03199    | 0,02975    |
|                      |          |          |            | 0,01230    |
|                      |          |          |            | 0,007953   |
|                      |          |          |            | 0,02595    |

– Panel C

|                      | M1       | M1 + CSE | M0         | M0+CSE     |
|----------------------|----------|----------|------------|------------|
|                      | 0,051400 | 0,055100 |            |            |
|                      | 0,024326 | 0,027057 |            |            |
|                      | 0,014851 | 0,017840 |            |            |
|                      |          |          | 0,03923397 | 0,06422149 |
|                      |          |          | 0,04232435 | 0,07591812 |
| Number of values     |          |          | M1         | M1 + CSE   |
|                      |          |          | 3          | 3          |
|                      |          |          |            | M0         |
|                      |          |          |            | M0+CSE     |
|                      |          |          |            | 2          |
|                      |          |          |            | 2          |
| Minimum              |          |          | 0,01485    | 0,01784    |
| 25% Percentile       |          |          | 0,01485    | 0,01784    |
| Median               |          |          | 0,02433    | 0,02706    |
| 75% Percentile       |          |          | 0,0514     | 0,0551     |
| Maximum              |          |          | 0,0514     | 0,0551     |
| Mean                 |          |          | 0,03019    | 0,03333    |
| Std. Deviation       |          |          | 0,01897    | 0,01941    |
| Std. Error           |          |          | 0,01095    | 0,01120    |
|                      |          |          |            | 0,001545   |
|                      |          |          |            | 0,005848   |
| Lower 95% CI of mean |          |          | -0,01693   | -0,01488   |
| Upper 95% CI of mean |          |          | 0,07731    | 0,08154    |
|                      |          |          |            | 0,02115    |
|                      |          |          |            | -0,004240  |
|                      |          |          |            | 0,1444     |

Figure 2 – Panel D

|  | M1        | M1 + CSE  | M0           | M0+CSE      |
|--|-----------|-----------|--------------|-------------|
|  | 0,001162  | 0,001131  |              |             |
|  | 0,2633717 | 0,1295524 |              |             |
|  |           |           | 0,0000571703 | 0,00010338  |
|  |           |           | 0,0000669536 | 0,000108433 |

  

|                      | M1       | M1 + CSE | M0          | M0+CSE     |
|----------------------|----------|----------|-------------|------------|
| Number of values     | 2        | 2        | 2           | 2          |
| Minimum              | 0,001162 | 0,001131 | 5,717e-005  | 0,0001034  |
| 25% Percentile       | 0,001162 | 0,001131 | 5,717e-005  | 0,0001034  |
| Median               | 0,1323   | 0,06534  | 6,206e-005  | 0,0001059  |
| 75% Percentile       | 0,2634   | 0,1296   | 6,695e-005  | 0,0001084  |
| Maximum              | 0,2634   | 0,1296   | 6,695e-005  | 0,0001084  |
| Mean                 | 0,1323   | 0,06534  | 6,206e-005  | 0,0001059  |
| Std. Deviation       | 0,1854   | 0,09081  | 6,918e-006  | 3,573e-006 |
| Std. Error           | 0,1311   | 0,06421  | 4,892e-006  | 2,527e-006 |
| Lower 95% CI of mean | -1,534   | -0,7505  | -9,228e-008 | 7,380e-005 |
| Upper 95% CI of mean | 1,798    | 0,8812   | 0,0001242   | 0,0001380  |

Figure 3

– Panel A

| M2         | M2 + PolyIC | M2 + PolyIC + CSE 5% |
|------------|-------------|----------------------|
| 0,01505703 | 0,03428629  | 0,01368205           |
| 0,01714233 | 0,02678411  | 0,01429033           |

– Panel B

| M2       | M2 + PolyIC | M2 + PolyIC + CSE 5% |
|----------|-------------|----------------------|
| 0,000368 | 0,003748    | 0,002213             |
| 0,000304 | 0,003443    | 0,002220             |

– Panel C and D

- The values used to build graphs and the values behind the means, standard deviations and other measures reported

| M2   | M2+Poly(I:C) | M2+Poly(I:C)+CSE |
|------|--------------|------------------|
| 5,09 | 60,1         | 45,1             |
| 9,35 | 70,6         | 46,3             |

| M2   | M2+Poly(I:C) | M2+Poly(I:C)+CSE |
|------|--------------|------------------|
| 0,00 | 8,52         | 3,22             |
| 0,57 | 10,00        | 2,78             |

Figure 4

– Panel A

- The values used to build graphs and the values behind the means, standard deviations and other measures reported

| time | CSE | average ratio | OD     |         |         |        |          |        | ratio    |          |          |          |         |          |          |
|------|-----|---------------|--------|---------|---------|--------|----------|--------|----------|----------|----------|----------|---------|----------|----------|
| 24   | NT  | 1             | 0,2385 | 0,2388  | 1,1295  |        |          | 0,3582 | 1        | 1        | 1        |          |         |          | 1        |
|      | 5%  | 0,887340265   | 0,178  | 0,2608  |         |        |          | 0,295  | 0,746331 | 1,092127 |          |          |         |          | 0,823562 |
|      | 10% | 0,62562099    | 0,1655 | 0,2208  | 0,28325 |        |          | 0,2268 | 0,69392  | 0,924623 | 0,250775 |          |         |          | 0,633166 |
| 72   | NT  | 1             | 0,8965 | 1,67525 | 1,94575 | 1,023  | 2,926833 | 1,4264 | 1        | 1        | 1        | 1        | 1       | 1        | 1        |
|      | 5%  | 0,680940589   | 0,443  | 1,1154  |         | 0,6746 | 1,742667 | 1,412  | 0,494144 | 0,665811 |          | 0,659433 | 0,59541 | 0,989905 |          |
|      | 10% | 0,486543385   | 0,2575 | 0,6548  | 0,589   |        |          | 1,377  | 0,287228 | 0,390867 | 0,302711 |          |         |          | 0,965367 |

- Panel B

- The values used to build graphs

| ratio | M0       | M0+CSE    | M2   | M2+CSE    |
|-------|----------|-----------|------|-----------|
|       | 1,000000 | 0,3157895 | 1,00 | 0,9879519 |
|       | 1,000000 | 0,680000  | 1,00 | 0,7272727 |
|       | 1,000000 | 0,740000  | 1,00 | 0,730000  |
|       | 1,000000 | 0,560000  | 1,00 | 1,160000  |
|       |          |           | 1,00 | 0,840000  |

- The values behind the means, standard deviations and other measures reported

| Raw data | M0 NT      | M0+CSE     | M2 NT      | M2+CSE     |
|----------|------------|------------|------------|------------|
|          | 1900000,00 | 600000,00  | 2766666,00 | 2733333,00 |
|          | 2900000,00 | 1966666,00 | 4033333,00 | 2933333,00 |
|          | 3200000,00 | 2366666,00 | 4200000,00 | 3066666,00 |
|          | 5966000,00 | 3312000,00 | 3900000,00 | 4533332,00 |
|          |            |            | 7200000,00 | 6066000,00 |

- Panel C

- The values used to build graphs

| ratio | M0 | M0+CSE    | M2 | M2+CSE    |
|-------|----|-----------|----|-----------|
|       | 1, | 0,670000  | 1, | 0,8492997 |
|       | 1, | 0,710000  | 1, | 0,9007708 |
|       | 1, | 0,600000  | 1, | 0,9695536 |
|       | 1, | 0,660000  |    |           |
|       | 1, | 0,8154056 |    |           |

- The values behind the means, standard deviations and other measures reported

| Raw data | M0       | M0+CSE 5% |
|----------|----------|-----------|
|          | 1,675250 | 1,115400  |
|          | 0,896500 | 0,443000  |
|          | 2,926833 | 1,742667  |
|          | 1,530000 | 1,010000  |
|          | 2,079333 | 1,695500  |
| Raw data | M2       | M2+CSE 5% |
|          | 1,071000 | 0,909600  |
|          | 1,881167 | 1,694500  |
|          | 1,691500 | 1,640000  |

– Panel D

- The values used to build graphs

| ratio |     |           |      |           |
|-------|-----|-----------|------|-----------|
| M0    |     | M0+CSE    | M2   | M2+CSE    |
|       | 1,0 | 0,6538461 | 1,00 | 0,8333333 |
|       | 1,0 | 0,720000  | 1,00 | 1,153846  |
|       | 1,0 | 0,5973154 | 1,00 | 0,6244898 |
|       | 1,0 | 0,6237624 |      |           |

- The values behind the means, standard deviations and other measures reported

| Raw data |      |        |      |        |
|----------|------|--------|------|--------|
| M0       |      | M0+CSE | M2   | M2+CSE |
|          | 26,0 | 17,0   | 15,0 | 12,5   |
|          | 25,0 | 18,0   | 13,0 | 15,0   |
|          | 14,9 | 8,9    | 8,2  | 5,1    |
|          | 13,5 | 8,4    |      |        |

**Figure 5**

- The values used to build graphs

| ratio |     |           |         |             |
|-------|-----|-----------|---------|-------------|
| RAW   |     | RAW+CSE   | RAW/LLC | RAW/LLC+CSE |
|       | 1,0 | 0,797048  | 1,0     | 0,685714    |
|       | 1,0 | 0,797048  | 1,0     | 0,900000    |
|       | 1,0 | 0,9446495 | 1,0     | 0,728571    |
|       | 1,0 | 1,003690  | 1,0     | 1,071429    |
|       | 1,0 | 0,6199262 | 1,0     | 0,985714    |
|       | 1,0 | 0,6199262 |         |             |
|       | 1,0 | 0,501845  |         |             |

- The values behind the means, standard deviations and other measures reported

| Raw data |     |         |         |             |
|----------|-----|---------|---------|-------------|
| RAW      |     | RAW+CSE | RAW/LLC | RAW/LLC+CSE |
|          | 3,7 | 2,7     | 2,5     | 1,6         |
|          | 3,5 | 2,7     | 3,1     | 2,1         |
|          | 2,8 | 3,2     | 2,7     | 1,7         |
|          | 3,3 | 3,4     | 2,4     | 2,5         |
|          | 2,8 | 2,1     | 1,8     | 2,3         |
|          | 3,2 | 2,1     | 1,5     |             |
|          | 3,9 | 1,7     |         |             |

| statistics       | RAW   | RAW+CSE | RAW/LLC | RAW/LLC+CSE |
|------------------|-------|---------|---------|-------------|
| Number of values | 7     | 7       | 6       | 5           |
| Minimum          | 2,800 | 1,700   | 1,500   | 1,600       |
| 25% Percentile   | 2,900 | 2,100   | 1,725   | 1,650       |
| Median           | 3,400 | 2,700   | 2,450   | 2,100       |
| 75% Percentile   | 3,850 | 3,200   | 2,800   | 2,400       |
| Maximum          | 3,900 | 3,400   | 3,100   | 2,500       |

|                      |        |        |        |        |
|----------------------|--------|--------|--------|--------|
| Mean                 | 3,388  | 2,557  | 2,333  | 2,040  |
| Std. Deviation       | 0,4422 | 0,6214 | 0,5888 | 0,3847 |
| Std. Error           | 0,1563 | 0,2349 | 0,2404 | 0,1720 |
| Lower 95% CI of mean | 3,018  | 1,982  | 1,715  | 1,562  |
| Upper 95% CI of mean | 3,757  | 3,132  | 2,951  | 2,518  |

**Figure 6**

– Panel B and C

- The values used to build graphs

| ratio    | M1/LLC1  | M1/LLC1+CSE | M2/LLC1  | M2/LLC1+CSE |
|----------|----------|-------------|----------|-------------|
| ratio 3  | 1,000000 | 1,020000    | 1,000000 | 1,410000    |
| ratio 3b | 1,000000 | 0,800000    | 1,000000 | 1,890000    |
| ratio 3c | 1,000000 | 1,010000    | 1,000000 | 1,140000    |

| ratio    | M1/LLC1  | M2/LLC1  | M1/LLC1  | M2/LLC1  |
|----------|----------|----------|----------|----------|
| ratio 3  | 1,000000 | 1,290000 | 1,000000 | 1,790000 |
| ratio 3b | 1,000000 | 0,990000 | 1,000000 | 2,360000 |
| ratio 3c | 1,000000 | 1,290000 | 1,000000 | 1,480000 |

- The values behind the means, standard deviations and other measures reported

| raw data          | M1/LLC1+CSE | M2/LLC1+CSE |
|-------------------|-------------|-------------|
| exp. 3            |             |             |
| M1+LLC+CSE120.tif | 7,750000    |             |
| M1+LLC+CSE121.tif | 5,160000    |             |
| M1+LLC+CSE122.tif | 6,730000    |             |
| M1+LLC+CSE123.tif | 6,260000    |             |
| M2+LLC1+CSE31.tif |             | 10,800000   |
| M2+LLC1+CSE32.tif |             | 11,290000   |
| M2+LLC1+CSE33.tif |             | 8,120000    |
| M2+LLC1+CSE34.tif |             | 16,110000   |
| exp. 3b           |             |             |
| M2+CSE+LLC152.nd2 |             | 21,930000   |
| M2+CSE+LLC150.nd2 |             | 31,750000   |
| M2+CSE+LLC148.nd2 |             | 41,440000   |
| M2+CSE+LLC146.nd2 |             | 40,370000   |
| M2+CSE+LLC145.nd2 |             | 37,410000   |
| M1+LLC1+CSE24.nd2 | 13,610000   |             |
| M1+LLC1+CSE22.nd2 | 13,070000   |             |
| M1+LLC1+CSE20.nd2 | 13,820000   |             |
| M1+LLC1+CSE18.nd2 | 18,060000   |             |
| exp.3c            |             |             |
| 8                 | 5,800000    |             |
| 1                 | 18,740000   |             |
| 7                 | 10,140000   |             |
| 4                 |             | 19,820000   |
| 5                 |             | 19,420000   |
| 10                |             | 28,070000   |

| raw data | M2/LLC1 | M2/LLC1+CSE |
|----------|---------|-------------|
| exp.3    |         |             |

|                   |           |           |
|-------------------|-----------|-----------|
| M2+LLC124.tif     | 5,210000  |           |
| M2+LLC125.tif     | 6,110000  |           |
| M2+LLC126.tif     | 6,940000  |           |
| M2+LLC127.tif     | 8,600000  |           |
| M2+LLC128.tif     | 10,260000 |           |
| M2+LLC129.tif     | 13,780000 |           |
| M2+LLC130.tif     | 6,500000  |           |
| M2+LLC1+CSE31.tif |           | 10,800000 |
| M2+LLC1+CSE32.tif |           | 11,290000 |
| M2+LLC1+CSE33.tif |           | 8,120000  |
| M2+LLC1+CSE34.tif |           | 16,110000 |
| exp. 3b           |           |           |
| M2+CSE+LLC152.nd2 |           | 21,930000 |
| M2+CSE+LLC150.nd2 |           | 31,750000 |
| M2+CSE+LLC148.nd2 |           | 41,440000 |
| M2+CSE+LLC146.nd2 |           | 40,370000 |
| M2+CSE+LLC145.nd2 |           | 37,410000 |
| M2+LLC138.nd2     | 15,450000 |           |
| M2+LLC136.nd2     | 17,010000 |           |
| M2+LLC134.nd2     | 17,290000 |           |
| M2+LLC132.nd2     | 21,070000 |           |
| M2+LLC131.nd2     | 20,650000 |           |
| exp. 3c           |           |           |
| 3                 | 10,310000 |           |
| 9                 | 12,770000 |           |
| 6                 | 17,020000 |           |
| 4                 |           | 19,820000 |
| 5                 |           | 19,420000 |
| 10                |           | 28,070000 |

| statistics           | M2/LLC1 | M2/LLC1+CSE |
|----------------------|---------|-------------|
| Number of values     | 15      | 12          |
| Minimum              | 5,210   | 8,120       |
| 25% Percentile       | 6,940   | 12,50       |
| Median               | 12,77   | 20,88       |
| 75% Percentile       | 17,02   | 36,00       |
| Maximum              | 21,07   | 41,44       |
| Mean                 | 12,60   | 23,88       |
| Std. Deviation       | 5,344   | 11,76       |
| Std. Error           | 1,380   | 3,395       |
| Lower 95% CI of mean | 9,639   | 16,41       |
| Upper 95% CI of mean | 15,56   | 31,35       |

|                  | M1/LLC1+CSE | M2/LLC1+CSE |
|------------------|-------------|-------------|
| Number of values | 11          | 12          |
| Minimum          | 5,160       | 8,120       |
| 25% Percentile   | 6,260       | 12,50       |
| Median           | 10,14       | 20,88       |
| 75% Percentile   | 13,82       | 36,00       |
| Maximum          | 18,74       | 41,44       |
| Mean             | 10,83       | 23,88       |
| Std. Deviation   | 4,916       | 11,76       |

|                      |       |       |
|----------------------|-------|-------|
| Std. Error           | 1,482 | 3,395 |
| Lower 95% CI of mean | 7,529 | 16,41 |
| Upper 95% CI of mean | 14,13 | 31,35 |

### Supplementary Figure 3

– Panel A

| M0    | M0+CSE | M1   | M1+CSE |
|-------|--------|------|--------|
| 8,21  | 16,8   | 35,5 | 44,8   |
| 20,80 | 37,1   | 23,1 | 7,4    |

– Panel B

| M0    | M0+CSE | M1   | M1+CSE |
|-------|--------|------|--------|
| 6,19  | 13,8   | 22,8 | 14,    |
| 11,00 | 13,8   | 61,8 | 71,    |
| 17,10 | 19,6   |      |        |
